# Supplementary material for: Preparation of electrospray ALG/PDA–PVP nanocomposites and their application in cancer therapy
Source: Royal Society of Chemistry journal article supplement (doi:10.1039/c9sm01584a), 2019-11-04
Supplement: c9sm01584a1.pdf [file c9sm01584a1.pdf]

## Supporting information of

### **Preparation of electrospray ALG/PDA-PVP nanocomposites and its application in cancer therapy**

Yangjie Xu,<sup>a,1</sup> Jiulong Zhao,<sup>b,c,1</sup> Zhilun Zhang,<sup>a</sup> Jing Zhang,<sup>a</sup> Mingxian Huang,<sup>a</sup> Shige Wang,<sup>a,\*</sup> and Pei Xie<sup>b,c,\*</sup>

<sup>a</sup> College of Science, University of Shanghai for Science and Technology, No. 334 Jungong Road, Shanghai, P.R. China

<sup>b</sup> Department of Gastroenterology, Gongli Hospital, The Second Military Medical University, Shanghai, P.R. China

<sup>c</sup> Department of Gastroenterology, Changhai Hospital, The Second Military Medical University, Shanghai, P.R. China

\* To whom correspondence should be addressed email: winner0119@sina.com (Dr. Xie)  
and sgwang@usst.edu.cn (Dr. Wang)

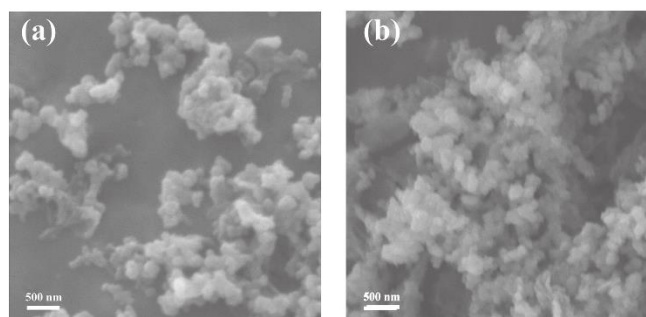

**Figure S1.** SEM images of materials at different bolus speeds: (a) 0.3 mL/h, (b) 0.8 mL/h.

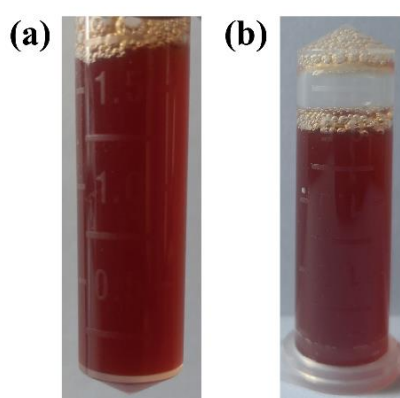

**Figure S2.** Digital photos of (a) fresh ALG/PDA/DOX-PVP and (b) ALG/PDA/DOX-PVP stored in mice serum for 24 h.

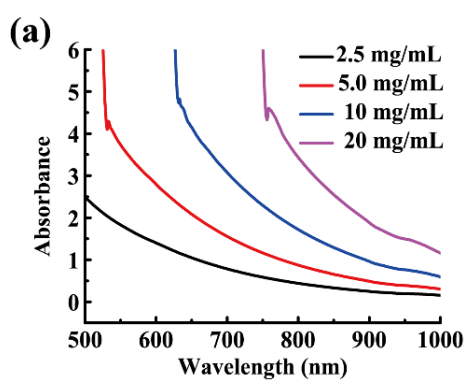

**Figure S3.** UV-vis-NIR spectra of ALG/PDA-PVP nanocomposites at different concentrations.

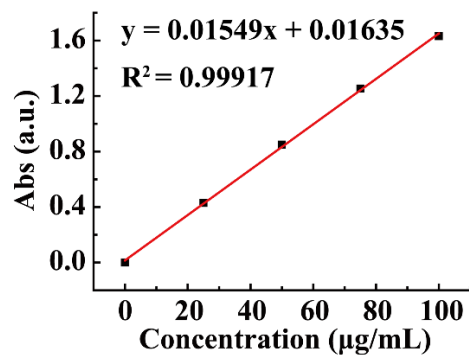

**Figure S4.** Standard curve of DOX.

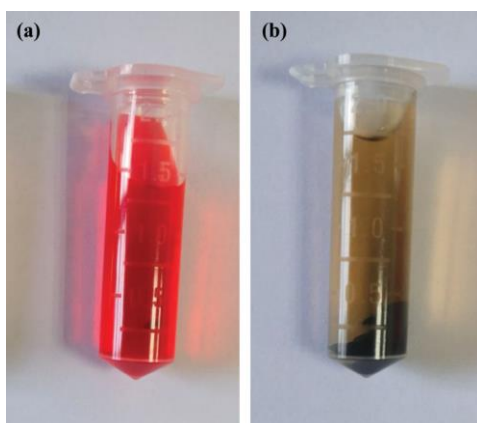

**Figure S5.** Pictures of (a) DOX solution (1 mg/mL) and (b) centrifuged coagulation bath containing ALG/PDA/DOX-PVP nanocomposites.

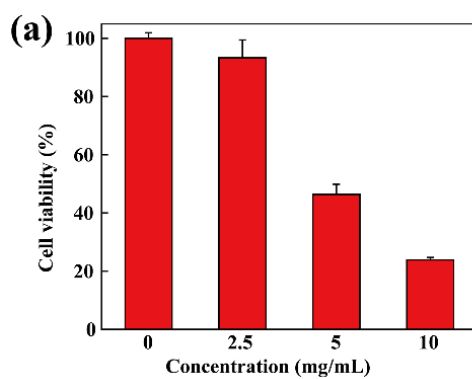

**Figure S6.** In vitro HT29 PTT performance of ALG/PDA-PVP nanocomposites at different concentrations under NIR laser irradiation (808 nm, 1.0 W/cm<sup>2</sup>)

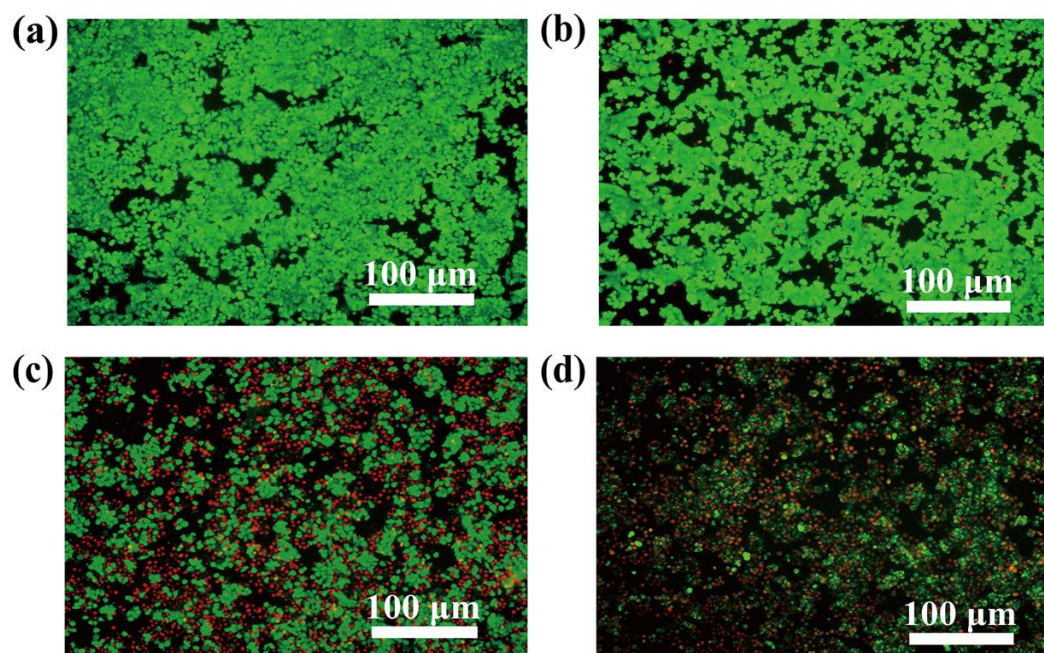

**Figure S7.** Live/dead stained morphology of cells cultured with different concentrations of ALG/PDA-PVP nanocomposites ((a) 0 mg/mL, (b) 2.5 mg/mL, (c) 5 mg/mL, and (d) 10 mg/mL) after photothermal therapy.

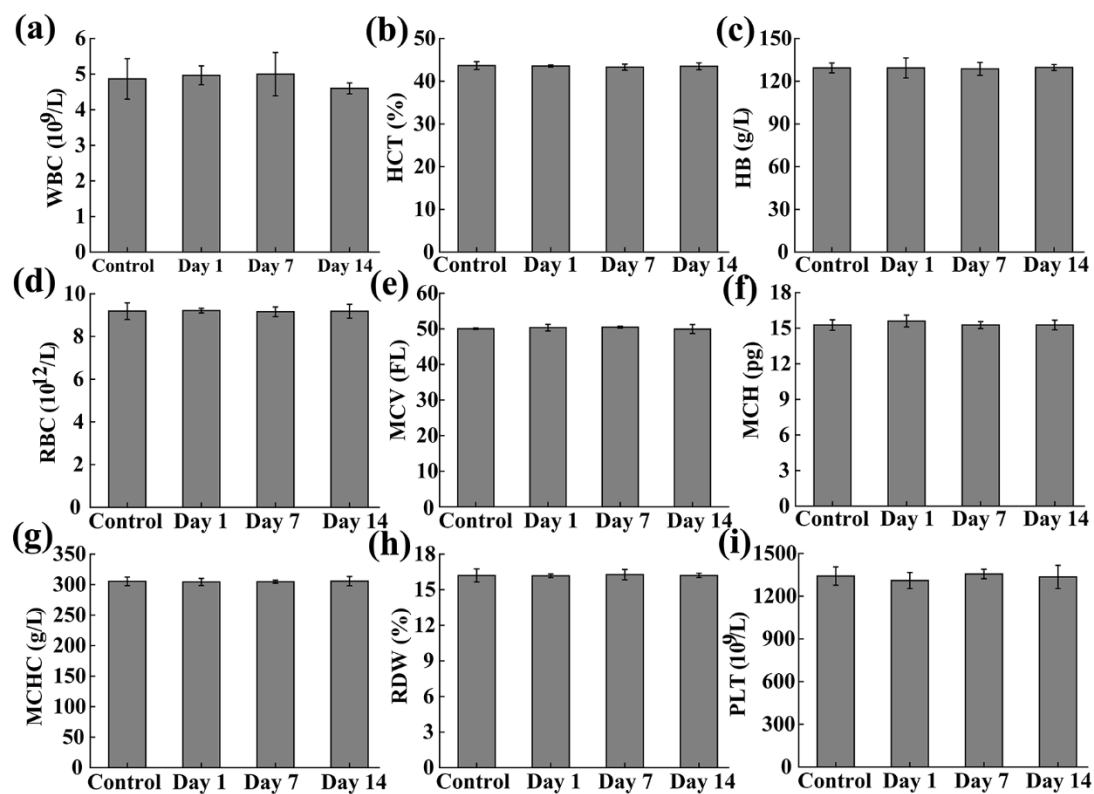

**Figure S8.** Blood routine examination results: (a) White blood cell count (WBC), (b)

hematocrit (HCT), (c) hemoglobin (HB), (d) red blood cell count (RBC), (e) mean corpuscular volume (MCV), (f) mean corpuscular hemoglobin (MCH), (g) mean corpuscular hemoglobin concentration (MCHC), (h) red cell distribution width (RDW), and (i) platelet (PLT) of healthy KM (control) injected with ALG/PDA-PVP for 1, 7 and 14 days.

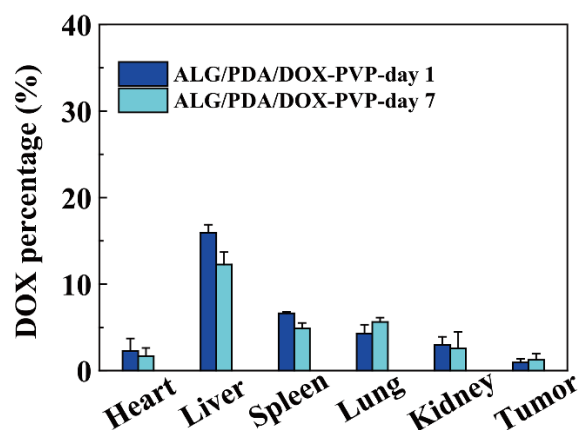

**Figure S9.** In vivo biodistribution of DOX in major organs and tumor after 1 and 7 days treatment with ALG/PDA/DOX-PVP nanocomposites.
